# Supplementary material for: A novel protocol for three-dimensional structure prediction of RNA-protein complexes
Source: PubMed Central journal article supplement — Sci Rep. 2013 May 28;3:1887. doi: 10.1038/srep01887 (PMC3664894; doi:10.1038/srep01887), 2013-05-28
Supplement: srep01887-s1.pdf [file srep01887-s1.pdf]

## Supplementary Data

# A novel protocol for three-dimensional structure prediction of RNA-protein complexes

Yangyu Huang<sup>1†</sup>, ShiyongLiu<sup>1†</sup>, Dachuan Guo<sup>1</sup>, Lin Li<sup>2</sup> and Yi Xiao<sup>1\*</sup>

<sup>1</sup>Biomolecular Physics and Modeling Group, Department of Physics

Huazhong University of Science and Technology, Wuhan 430074, Hubei, China

<sup>2</sup>Computational Biophysics and Bioinformatics, Department of Physics and Astronomy

Kinard Laboratory Building, Clemson University, SC 29634, USA

---

<sup>†</sup>These authors made equal contributions.

\*Corresponding author.

Supplementary Table S1 Protein-RNA complexes in our testing set I (66)

| PDB<br>id | Protein<br>Chain | RNA<br>Chain | PDB<br>id | Protein<br>Chain | RNA<br>Chain | PDB<br>id | Protein<br>Chain | RNA<br>Chain |
|-----------|------------------|--------------|-----------|------------------|--------------|-----------|------------------|--------------|
| 1ASY      | AB               | R            | 1K8W      | A                | B            | 2BGG      | A                | PQ           |
| 1DFU      | P                | MN           | 1KOG      | A                | I            | 2BH2      | A                | C            |
| 1OB2      | A                | B            | 1KQ2      | ABHIKM           | R            | 2BTE      | A                | B            |
| 1R3E      | A                | C            | 1M5O      | C                | AB           | 2BU1      | A                | R            |
| 2FMT      | A                | C            | 1M8V      | ABCDEFG          | O            | 2CZJ      | A                | B            |
| 1B23      | P                | R            | 1M8W      | A                | C            | 2ERR      | A                | B            |
| 1MFQ      | C                | A            | 1MMS      | A                | C            | 2F8K      | A                | B            |
| 1QTQ      | A                | B            | 1N78      | A                | C            | 2GJE      | AD               | RS           |
| 1U0B      | B                | A            | 1Q2R      | A                | E            | 2GJW      | AB               | EFH          |
| 1B7F      | A                | P            | 1SER      | AB               | T            | 2HGH      | A                | B            |
| 1C9S      | LMNOPQRSTU       | W            | 1T0K      | AB               | CD           | 2HW8      | A                | B            |
| 1DK1      | A                | B            | 1T4L      | B                | A            | 2I91      | B                | EF           |
| 1E7K      | A                | C            | 1U63      | A                | B            | 2IX1      | A                | B            |
| 1EC6      | A                | D            | 1WNE      | A                | BC           | 2PY9      | A                | E            |
| 1EKZ      | A                | B            | 1WPU      | A                | C            | 2QUX      | AB               | C            |
| 1F7U      | A                | B            | 1WSU      | A                | E            | 2R7R      | A                | X            |
| 1G1X      | A                | D            | 1YVP      | A                | CD           | 3BO2      | A                | BCDE         |
| 1H3E      | A                | B            | 2AD9      | A                | B            | 3BSB      | B                | C            |
| 1H4S      | AB               | T            | 2ADB      | A                | B            | 3BSO      | A                | PT           |
| 1HC8      | A                | C            | 2ADC      | A                | B            | 3BSX      | A                | C            |
| 1HVU      | AB               | C            | 2ASB      | A                | B            | 3BX2      | A                | C            |
| 1JBR      | B                | D            | 2AZ0      | AB               | CD           | 3CIY      | A                | CD           |

Supplementary Table S2 Protein-RNA complexes in our testing set II (72)

| PDB<br>id | Protein<br>Chain | RNA<br>Chain | PDB<br>id | Protein<br>Chain | RNA<br>Chain | PDB<br>id | Protein<br>Chain | RNA<br>Chain |
|-----------|------------------|--------------|-----------|------------------|--------------|-----------|------------------|--------------|
| 1C0A      | A                | B            | 2AKE      | A                | B            | 3OVB      | A                | C            |
| 1DFU      | P                | MN           | 2ANR      | A                | B            | 1F7U      | A                | B            |
| 1E8O      | CD               | E            | 2AZ0      | AB               | CD           | 1IL2      | A                | C            |
| 1F7Y      | A                | B            | 2BH2      | A                | C            | 1R9F      | A                | BC           |
| 1FFY      | A                | T            | 2CSX      | B                | D            | 1RC7      | A                | BCDE         |
| 1G1X      | FH               | IJ           | 2CZJ      | E                | F            | 1SER      | AB               | T            |
| 1GAX      | B                | D            | 2DU3      | A                | D            | 1UN6      | C                | E            |
| 1H4S      | AB               | T            | 2FK6      | A                | R            | 2BTE      | D                | E            |
| 1HQ1      | A                | B            | 2GJW      | AB               | EFH          | 2FMT      | A                | C            |
| 1J1U      | A                | B            | 2QUX      | DE               | F            | 2NUG      | AB               | CDEF         |
| 1JBS      | A                | C            | 2RFK      | A                | DE           | 2UWM      | A                | C            |
| 1JID      | A                | B            | 2XDB      | A                | G            | 2VPL      | A                | B            |
| 1K8W      | A                | B            | 2ZM5      | A                | C            | 2ZKO      | AB               | CD           |
| 1KOG      | CD               | K            | 2ZNI      | AB               | C            | 2ZZM      | A                | B            |
| 1LNG      | A                | B            | 2ZUE      | A                | B            | 3ADD      | A                | C            |
| 1MMS      | A                | C            | 3CIY      | A                | CD           | 3FTF      | A                | CD           |
| 1N78      | B                | D            | 3DD2      | H                | B            | 3HL2      | C                | E            |
| 1Q2R      | C                | F            | 3EPH      | A                | E            | 1H3E      | A                | B            |
| 1QTQ      | A                | B            | 3FOZ      | A                | C            | 1OOA      | B                | D            |
| 1R3E      | A                | CDE          | 3HHZ      | O                | R            | 1U0B      | B                | A            |
| 1S03      | H                | A            | 3LRR      | A                | CD           | 2HW8      | A                | B            |
| 1SJ3      | P                | R            | 3LWR      | ABC              | DE           | 2IPY      | A                | C            |
| 1T0K      | B                | CD           | 3MOJ      | B                | A            | 2R8S      | HL               | R            |
| 1YVP      | B                | EF           | 3OL9      | M                | NO           | 2V3C      | C                | M            |

Supplementary Table S3 Success rates of different protocols over three categories of the testing set II. For different protocols, top 1000 structures are generated by corresponding docking procedures and evaluated by corresponding scoring functions. For  $N_p=10$ , the success rates are compared.

|                     | easy | medium | hard |
|---------------------|------|--------|------|
| Number of complexes | 49   | 16     | 7    |
| RPDOCK & DECK-RP    | 49%  | 13%    | 0%   |
| GRAMM & DARS-RNP    | 35%  | 13%    | 0%   |
| FTDock & Li         | 16%  | 0%     | 0%   |

Supplementary Table S4 Protein-RNA complexes in our training set (118)

| PDB  | Protein | RNA   | PDB  | Protein | RNA   | PDB  | Protein | RNA   |
|------|---------|-------|------|---------|-------|------|---------|-------|
| id   | Chain   | chain | id   | Chain   | chain | id   | Chain   | chain |
| 1A9N | AB      | Q     | 2JLU | A       | C     | 3MOJ | B       | A     |
| 1AV6 | A       | B     | 2PJP | A       | B     | 3MQK | A       | DE    |
| 1C0A | A       | B     | 2R8S | HL      | R     | 3NMR | A       | B     |
| 1CVJ | A       | M     | 2V3C | C       | M     | 3NMU | AG      | DI    |
| 1CX0 | A       | B     | 2VNU | D       | B     | 3O3I | X       | A     |
| 1DI2 | AB      | CD    | 2XD0 | Y       | V     | 3OIJ | AB      | C     |
| 1DUL | A       | B     | 2XLI | A       | B     | 3OL6 | A       | BC    |
| 1FEU | A       | BC    | 2XS2 | A       | B     | 3Q0N | A       | C     |
| 1FFY | A       | T     | 2XZO | A       | D     | 3QJJ | B       | R     |
| 1GAX | A       | C     | 2Y8W | A       | B     | 3R2C | A       | R     |
| 1H2C | A       | R     | 2YKG | A       | CD    | 3RC8 | A       | E     |
| 1J1U | A       | B     | 2ZI0 | A       | CD    | 3RW6 | A       | H     |
| 1JID | A       | B     | 2ZKO | AB      | CD    | 3SIU | AB      | C     |
| 1L9A | A       | B     | 3FOZ | AB      | C     | 3SN2 | A       | B     |
| 1LNG | A       | B     | 2ZZM | A       | B     | 3SNP | A       | C     |
| 1N35 | A       | BC    | 2ZZN | A       | C     | 3T5N | A       | C     |
| 1OOA | A       | C     | 3A6P | A       | DE    | 3TRZ | A       | U     |
| 1R9F | A       | BC    | 3ADB | A       | C     | 3V7E | A       | C     |
| 1YYK | AB      | CDEF  | 3AEV | AB      | C     | 4E78 | A       | PT    |
| 1RLG | A       | C     | 3HSB | ABCDEF  | X     | 4ERD | AB      | CD    |
| 1S03 | H       | A     | 3AMT | A       | B     | 1A1T | A       | B     |
| 1SI3 | A       | B     | 3AVU | A       | TG    | 1AUD | A       | B     |
| 1TFW | A       | GJ    | 3AVY | A       | GT    | 1FJE | B       | A     |
| 1VFG | A       | C     | 3DD2 | H       | B     | 1K1G | A       | B     |
| 1YTY | AB      | CD    | 3DH3 | B       | F     | 1L1C | AB      | C     |

|      |      |      |      |        |    |      |    |   |
|------|------|------|------|--------|----|------|----|---|
| 1YYW | A    | EFGH | 3EPH | A      | E  | 1RGO | A  | D |
| 1ZBH | AD   | F    | 3EQT | AB     | CD | 1RKJ | A  | B |
| 2ANN | A    | B    | 3FTE | A      | CD | 2CJK | A  | B |
| 2AZX | A    | C    | 3G0H | A      | E  | 2FY1 | A  | B |
| 2B3J | AB   | E    | 3GIB | ABC    | H  | 2JPP | AB | C |
| 2CSX | A    | C    | 3HL2 | AB     | E  | 2KFY | A  | B |
| 2DB3 | A    | E    | 3I5X | A      | B  | 2KH9 | A  | B |
| 2DR5 | A    | B    | 3IAB | AB     | R  | 2L3C | A  | B |
| 2DU3 | A    | D    | 3ICE | ABCDEF | G  | 2LEB | A  | B |
| 2EZ6 | AB   | CD   | 3IEV | A      | D  | 2LI8 | A  | B |
| 2F8S | A    | CD   | 3K5Q | A      | B  | 2RQC | A  | B |
| 2FK6 | A    | R    | 3KS8 | AB     | EF | 2XFM | A  | B |
| 2GXB | A    | EF   | 3L25 | ABDE   | CF | 2YH1 | A  | B |
| 2HVY | ABCD | E    | 3LRR | A      | CD |      |    |   |
| 2I82 | A    | E    | 3MDG | AB     | C  |      |    |   |

---

Supplementary Table S5 Classification of amino acids based on the dipoles and volumes of the side chains (based on Shen, J. et al. *Proc Natl Acad Sci U S A* **104**, 4337-41 (2007))

| Type | Residues           |
|------|--------------------|
| 1    | ALA, GLY, VAL      |
| 2    | ILE, LEU, PHE, PRO |
| 3    | TYR, MET, THR, SER |
| 4    | HIS, ASN, GLN, TRP |
| 5    | ARG, LYS           |
| 6    | ASP, GLU           |
| 7    | CYS                |

---

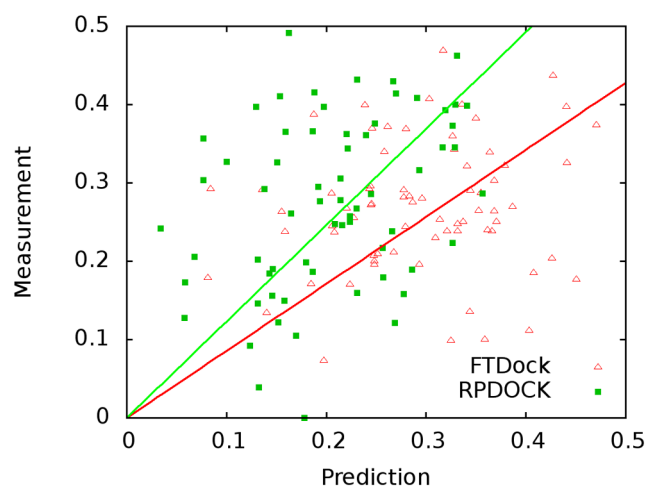

Supplementary Figure S1 The comparison of the fractions of the fully buried atoms in the interface atoms for the top-one complex structures predicted by FTDock and RPDock with those for the measured ones in the bound training set.
